# Supplementary material
Source: PubMed Central journal article supplement (PMC9923569)
Supplement: PEDS_20170492SupplementaryData.pdf [file PEDS_20170492SupplementaryData.pdf]

## Supplemental Information

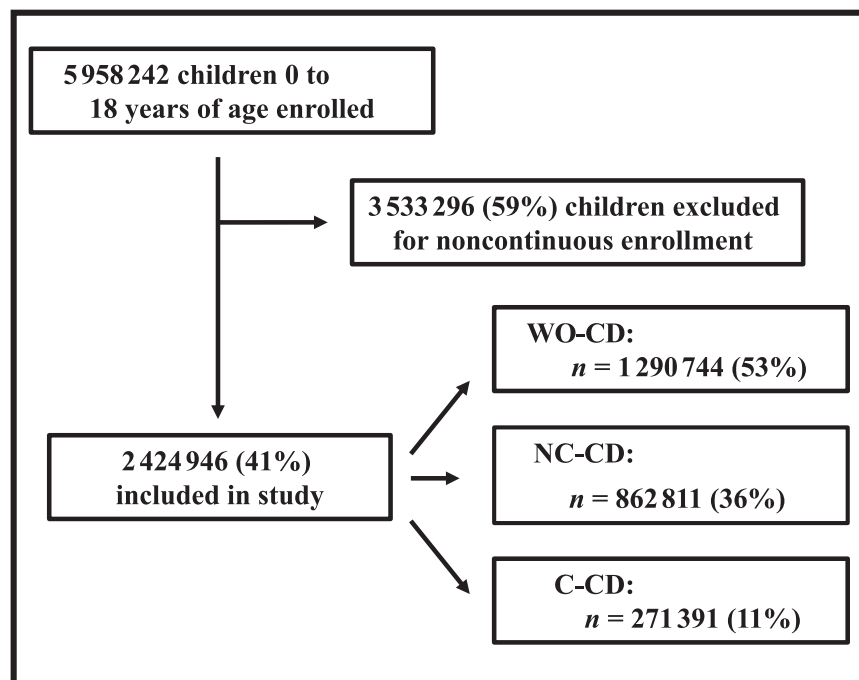

### SUPPLEMENTAL FIGURE 2

Children and adolescents enrolled in Medicaid in 7 de-identified states as obtained from the Truven Marketscan Database from January 1, 2012 to December 31, 2013.

**SUPPLEMENTAL TABLE 5** Annualized and PMPY Expenditures From January 1, 2012, to December 31, 2013 for Children WO-CDs, With NC-CDs, and With C-CDs

|                                  | Overall       | WO-CD (CRG 1–2)      | NC-CD (CRG 3–5)      | C-CD (CRG 6–9)       |
|----------------------------------|---------------|----------------------|----------------------|----------------------|
| Enrollees, <i>N</i> (%)          | 2 424 946     | 1 290 744 (53.2)     | 862 811 (35.6)       | 271 391 (11.2)       |
| Annual spending, \$ (% of total) | 7 226 354 620 | 1 443 356 179 (20.0) | 2 395 014 457 (33.1) | 3 387 983 985 (46.9) |
| Total PMPY, \$                   | 3037          | 1151                 | 2801                 | 12 569               |
| Inpatient                        | 738           | 139                  | 445                  | 4454                 |
| Outpatient                       | 2050          | 982                  | 2123                 | 6785                 |
| Retail pharmacy                  | 275           | 37                   | 256                  | 1439                 |

PMPY expenditures are detailed by the location of care. All comparisons are significant at the  $P < .001$  level by the Kruskal-Wallis test.
